# Supplementary material for: Regulation of actin dynamics by WNT-5A: implications for human airway smooth muscle contraction
Source: PubMed Central journal article supplement (PMC4965744; doi:10.1038/srep30676), 2016-07-29

## **Regulation of actin dynamics by WNT-5A: implications for human airway smooth muscle contraction**

\*Tim Koopmans<sup>1,2</sup>, Kuldeep Kumawat<sup>1,2</sup>, Andrew J Halayko<sup>3</sup>, Reinoud Gosens<sup>1,2</sup>

<sup>1</sup>Department of Molecular Pharmacology, University of Groningen, The Netherlands

<sup>2</sup>Groningen Research Institute for Asthma and COPD (GRIAC), University of Groningen, The Netherlands

<sup>3</sup>Department of Physiology and Pathophysiology, University of Manitoba, Canada

Figure 1B

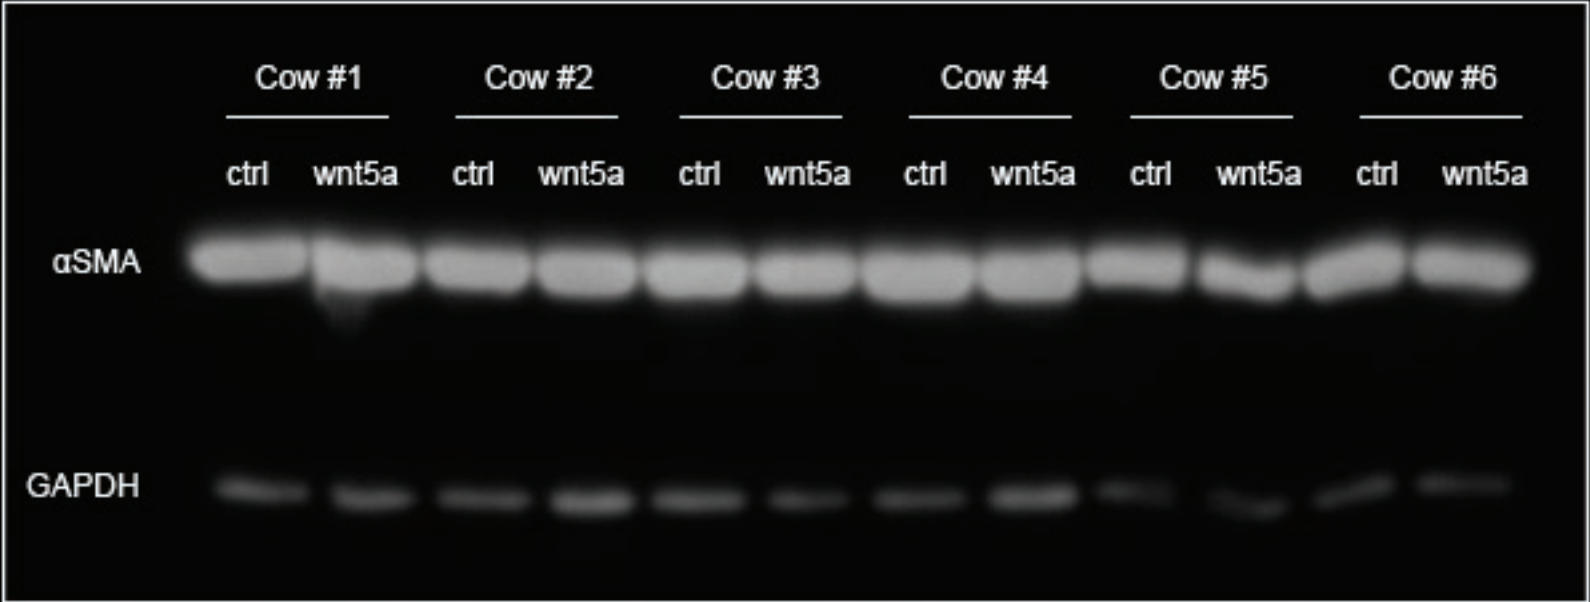

Membrane #1

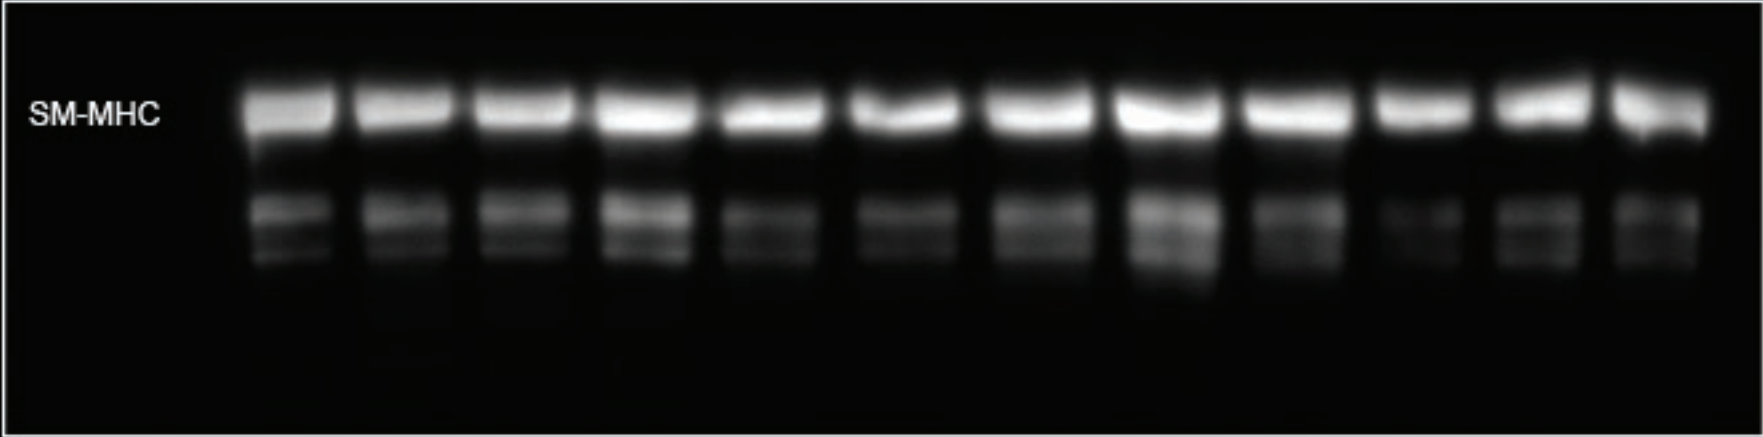

Membrane #2

Figure 3A

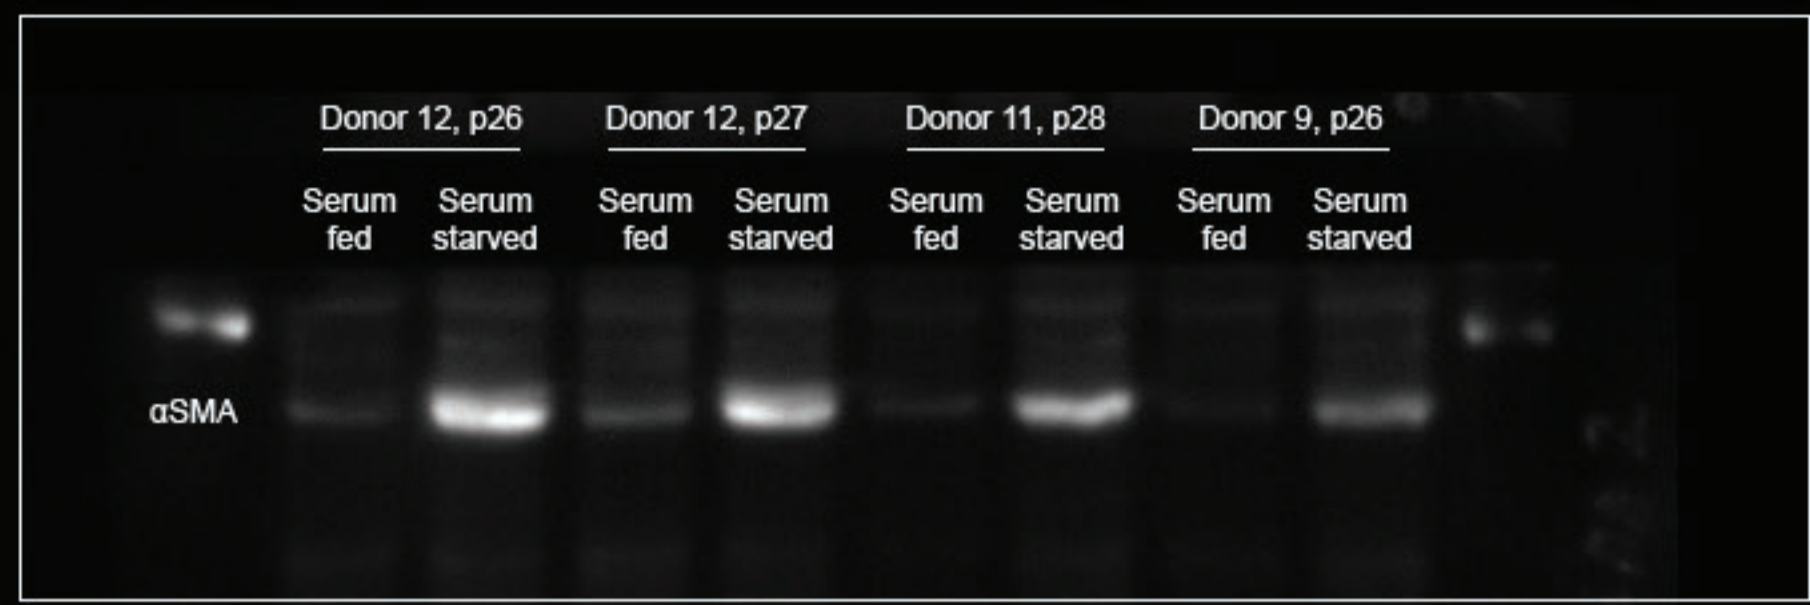

Membrane #1

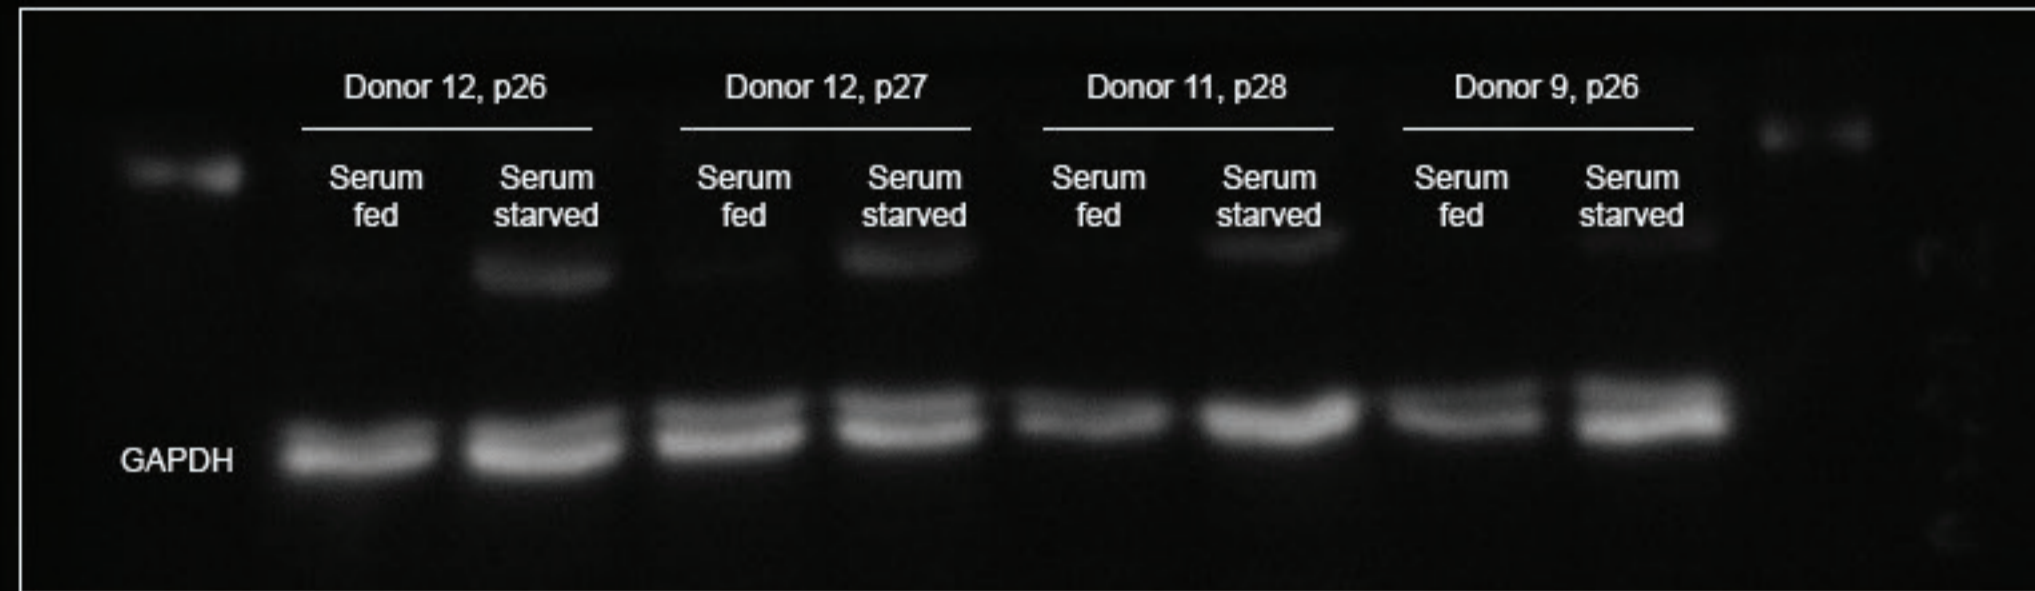

Membrane #1

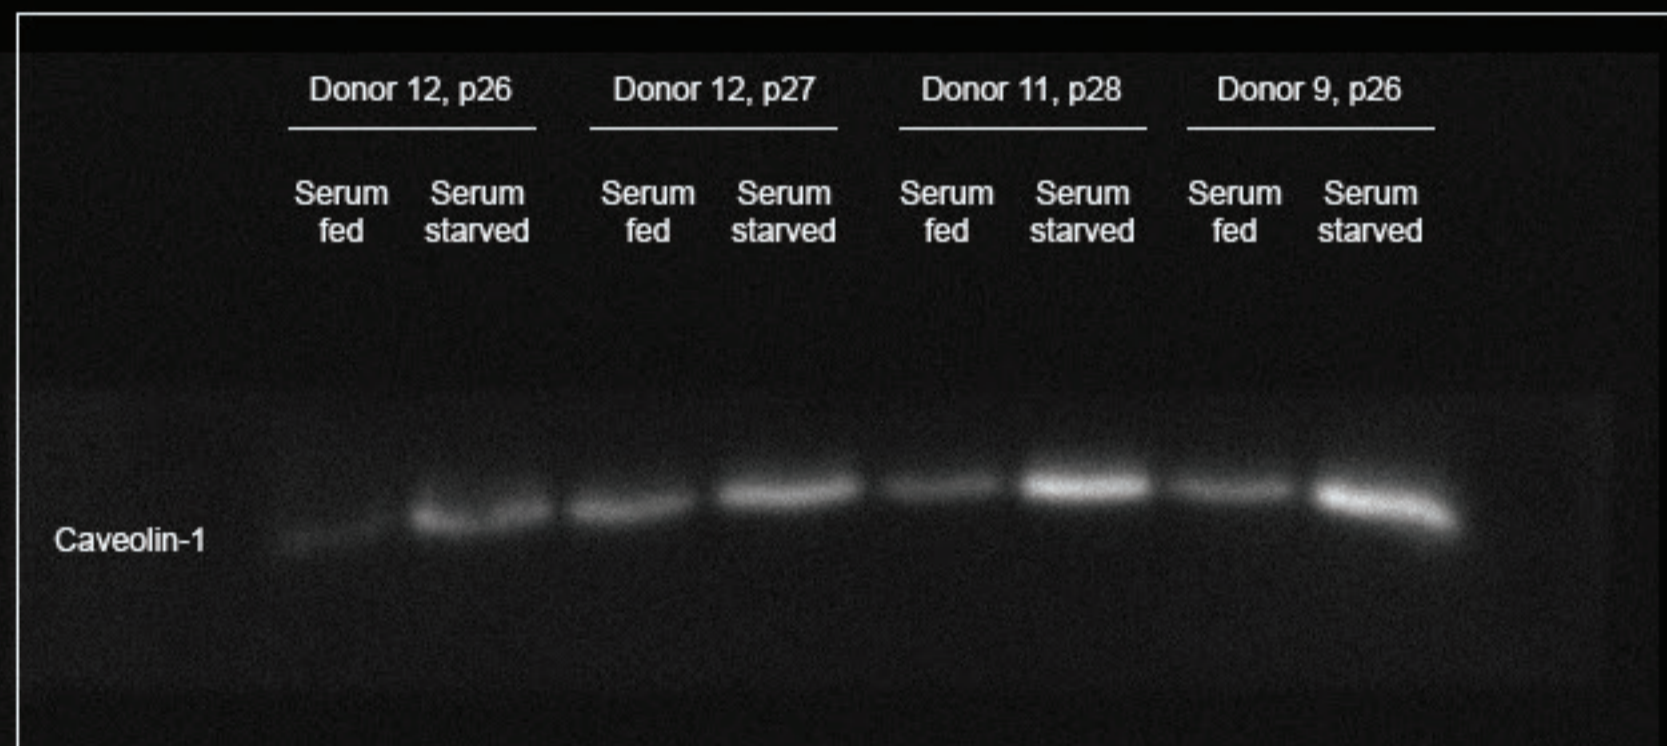

Membrane #2

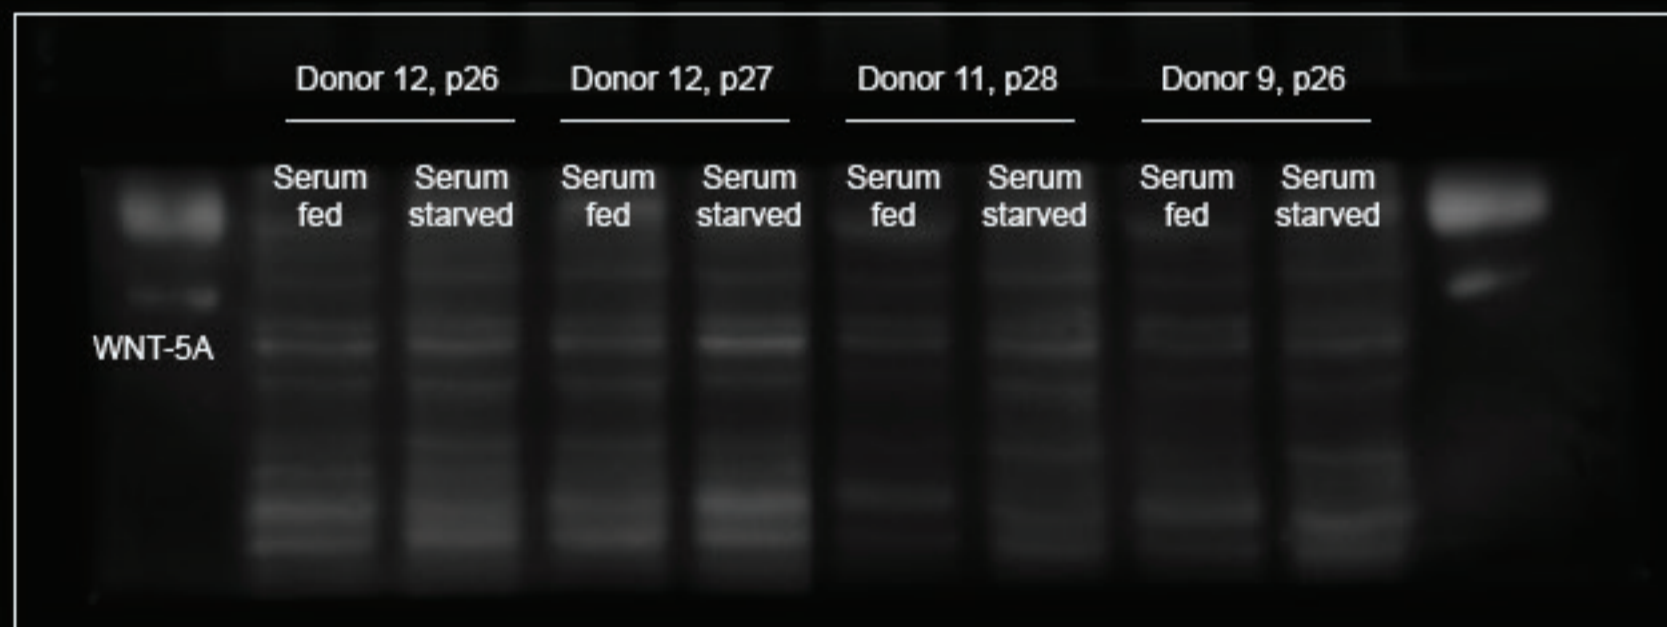

Membrane #2

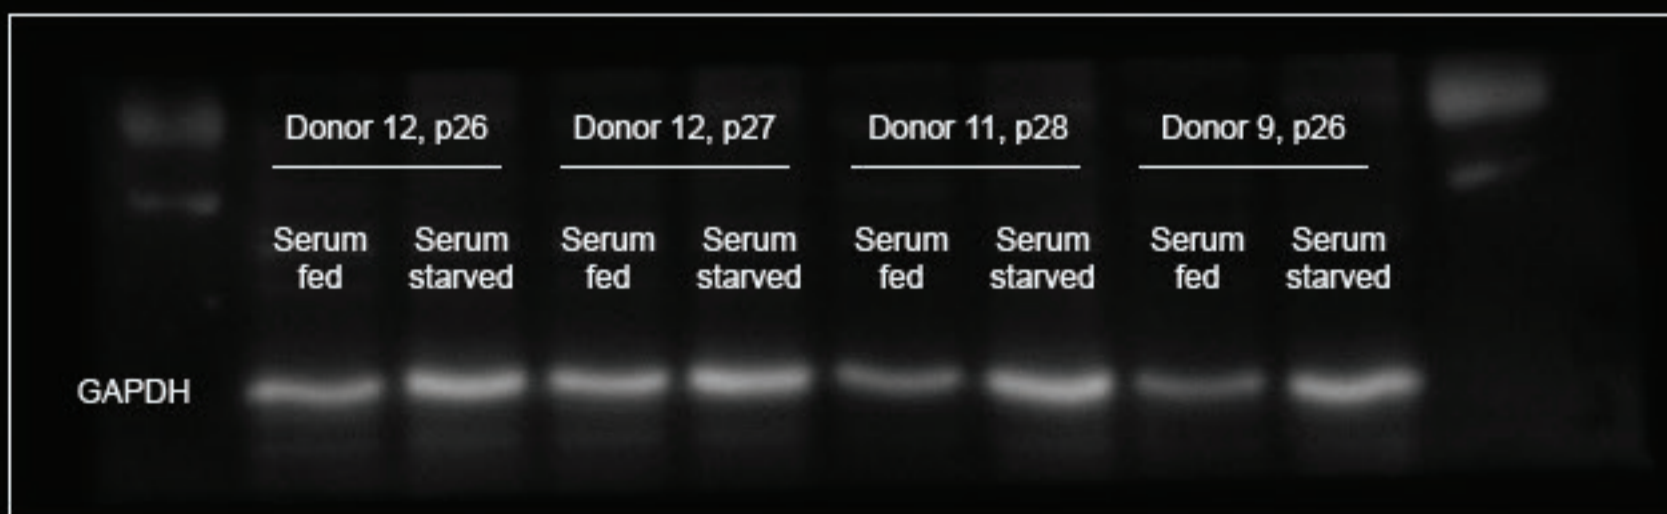

Membrane #2

Figure 3B

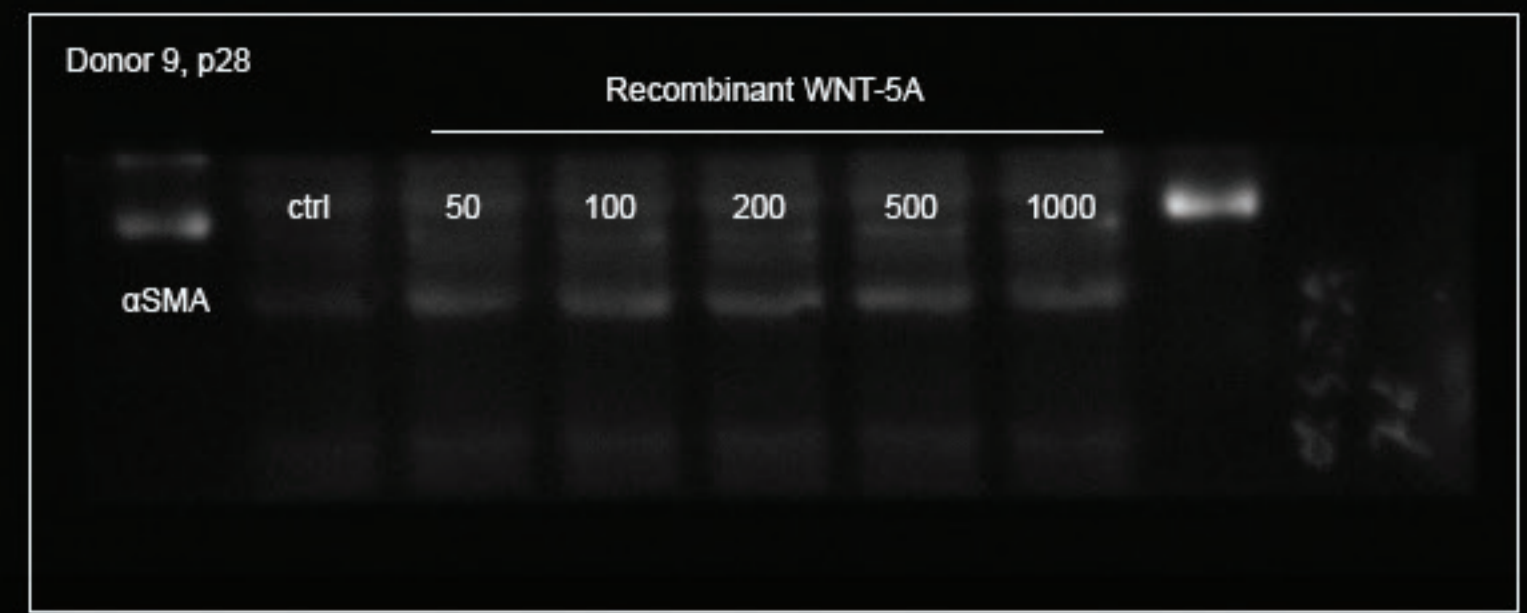

Membrane #1

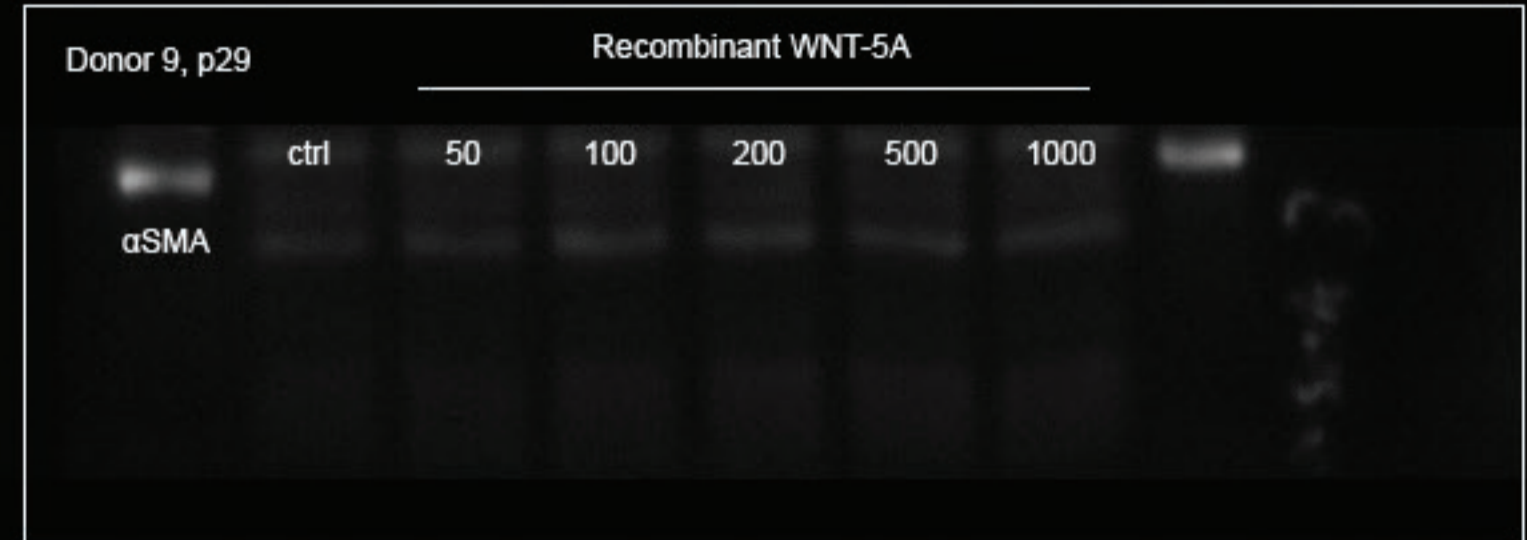

Membrane #2

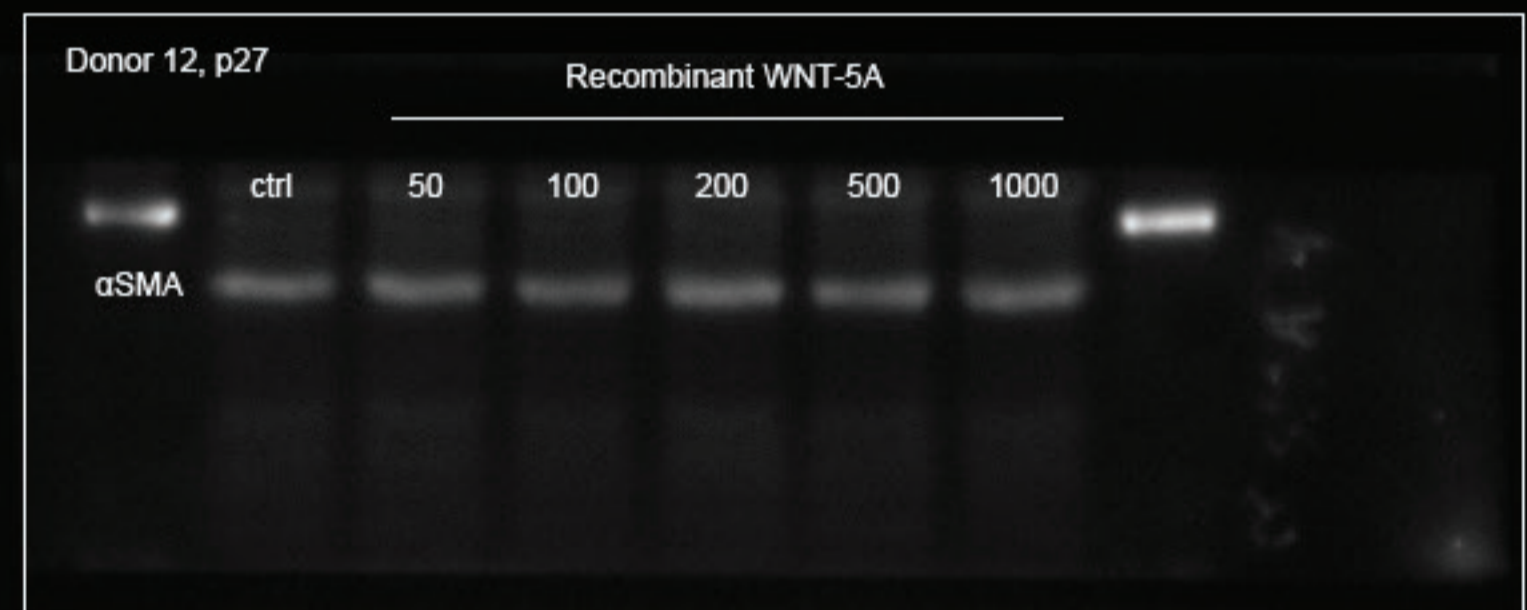

Membrane #3

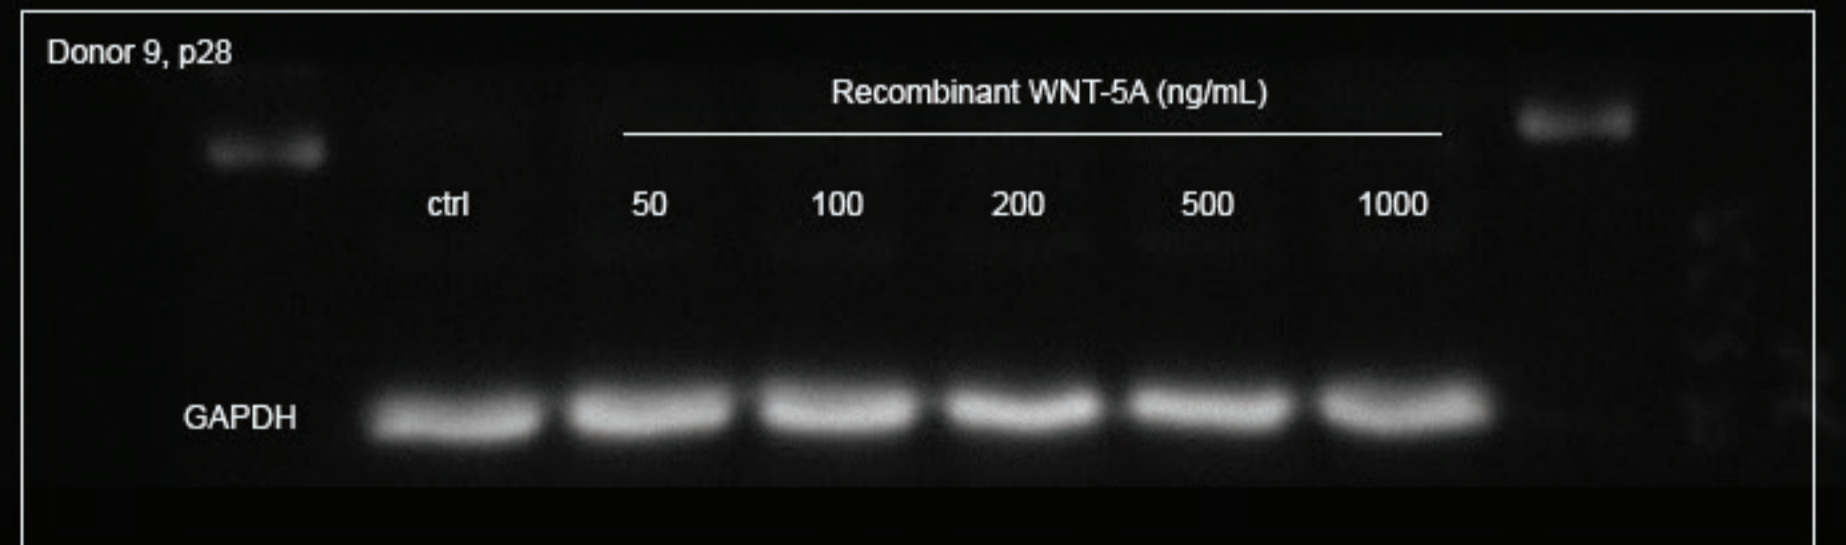

Membrane #1

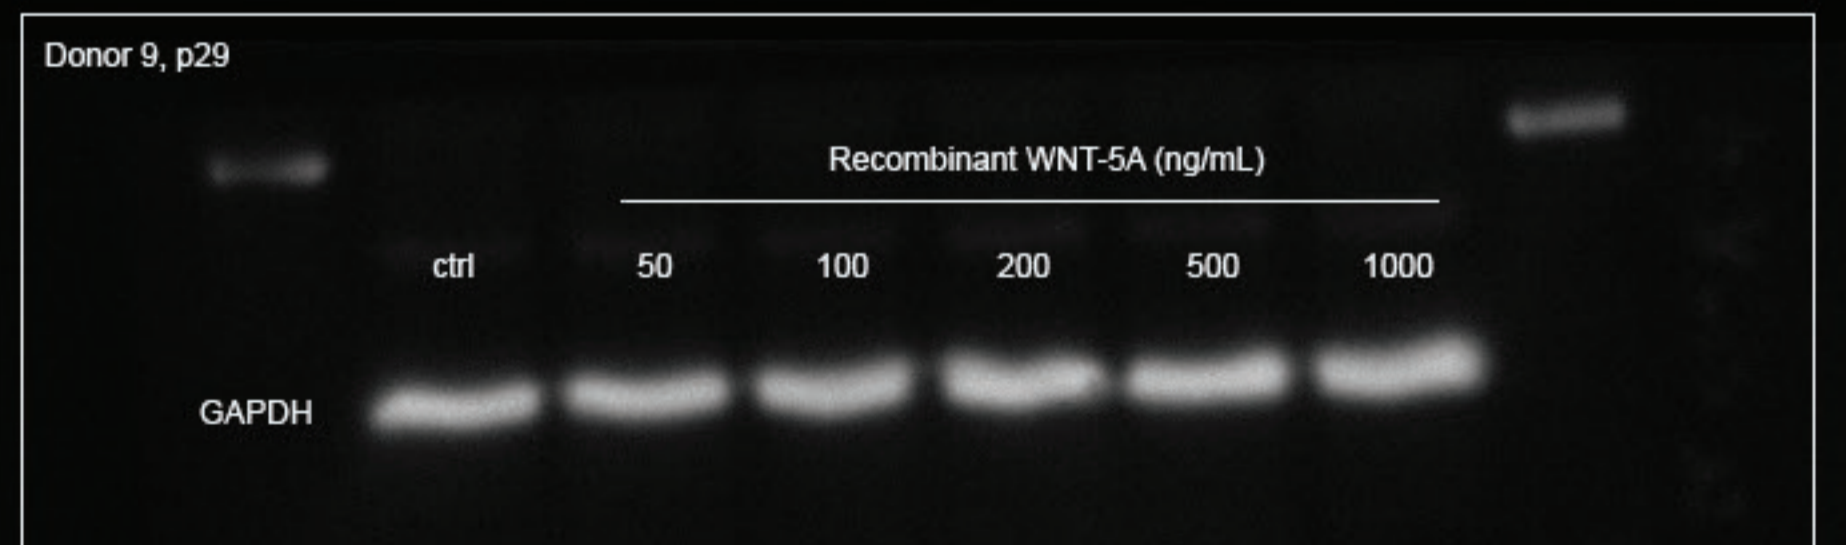

Membrane #2

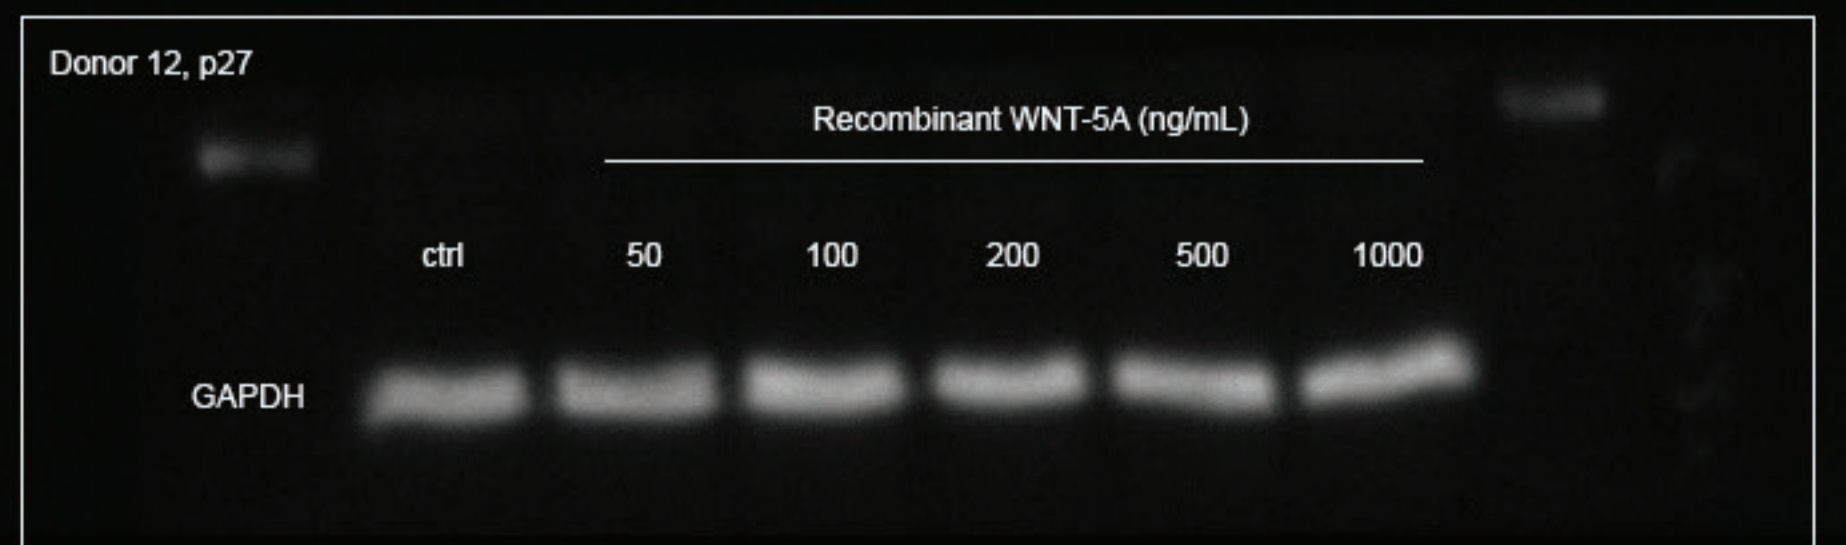

Membrane #3

Figure 6A/C

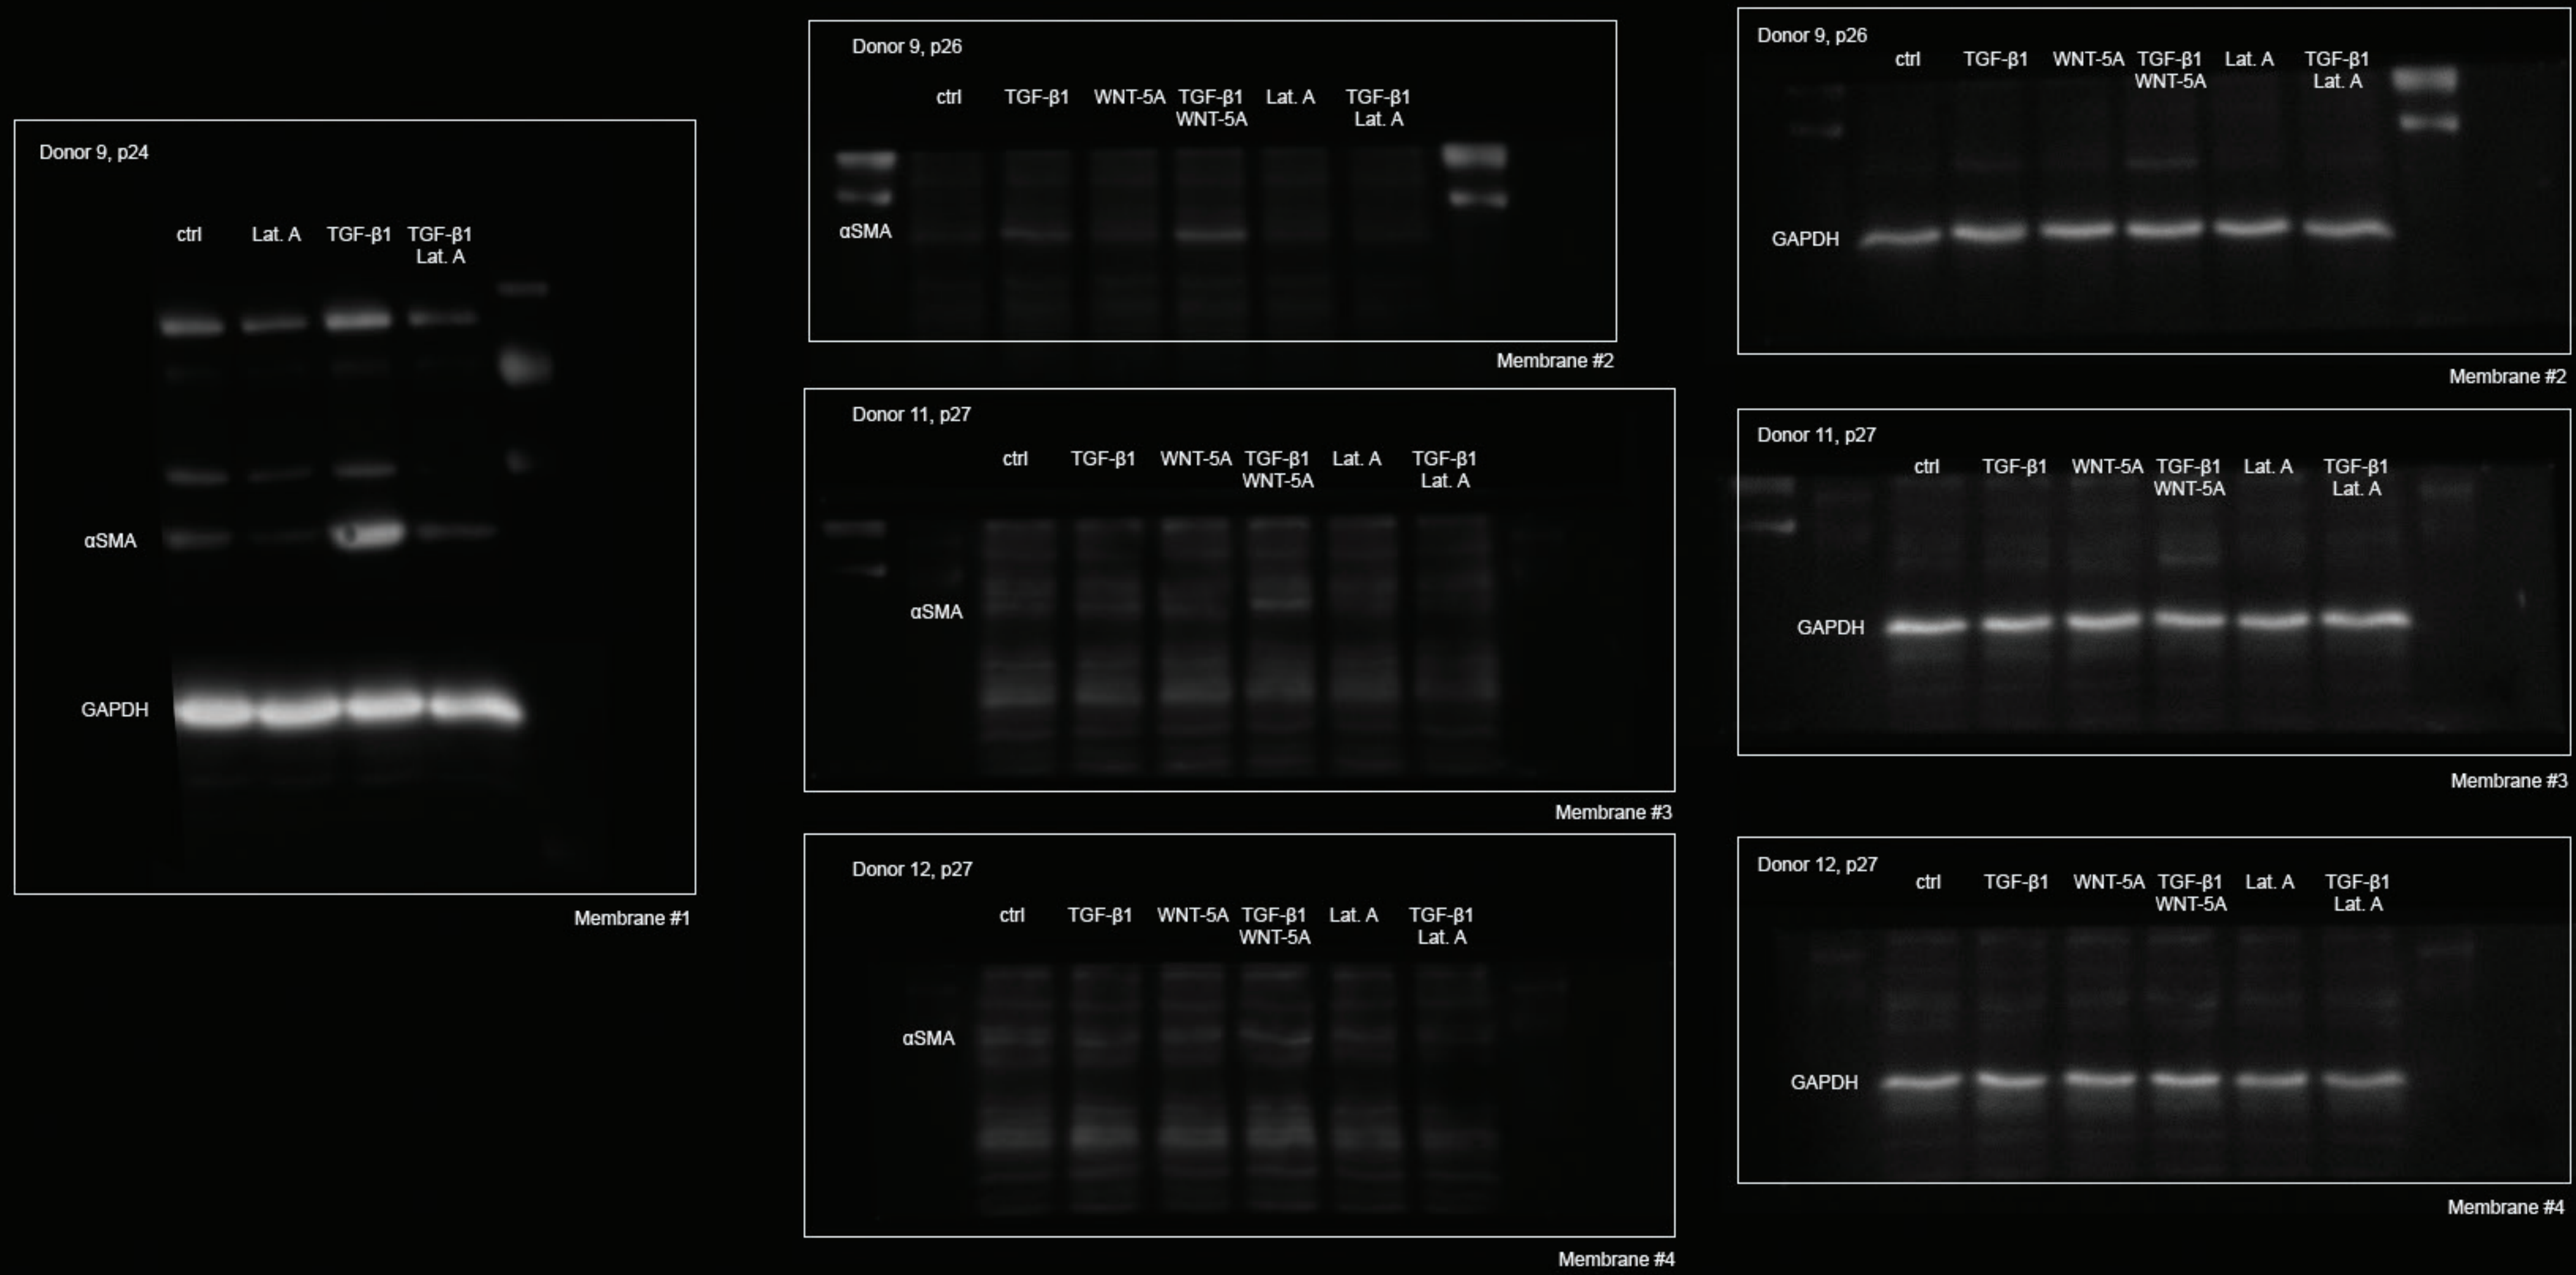

Figure 6B

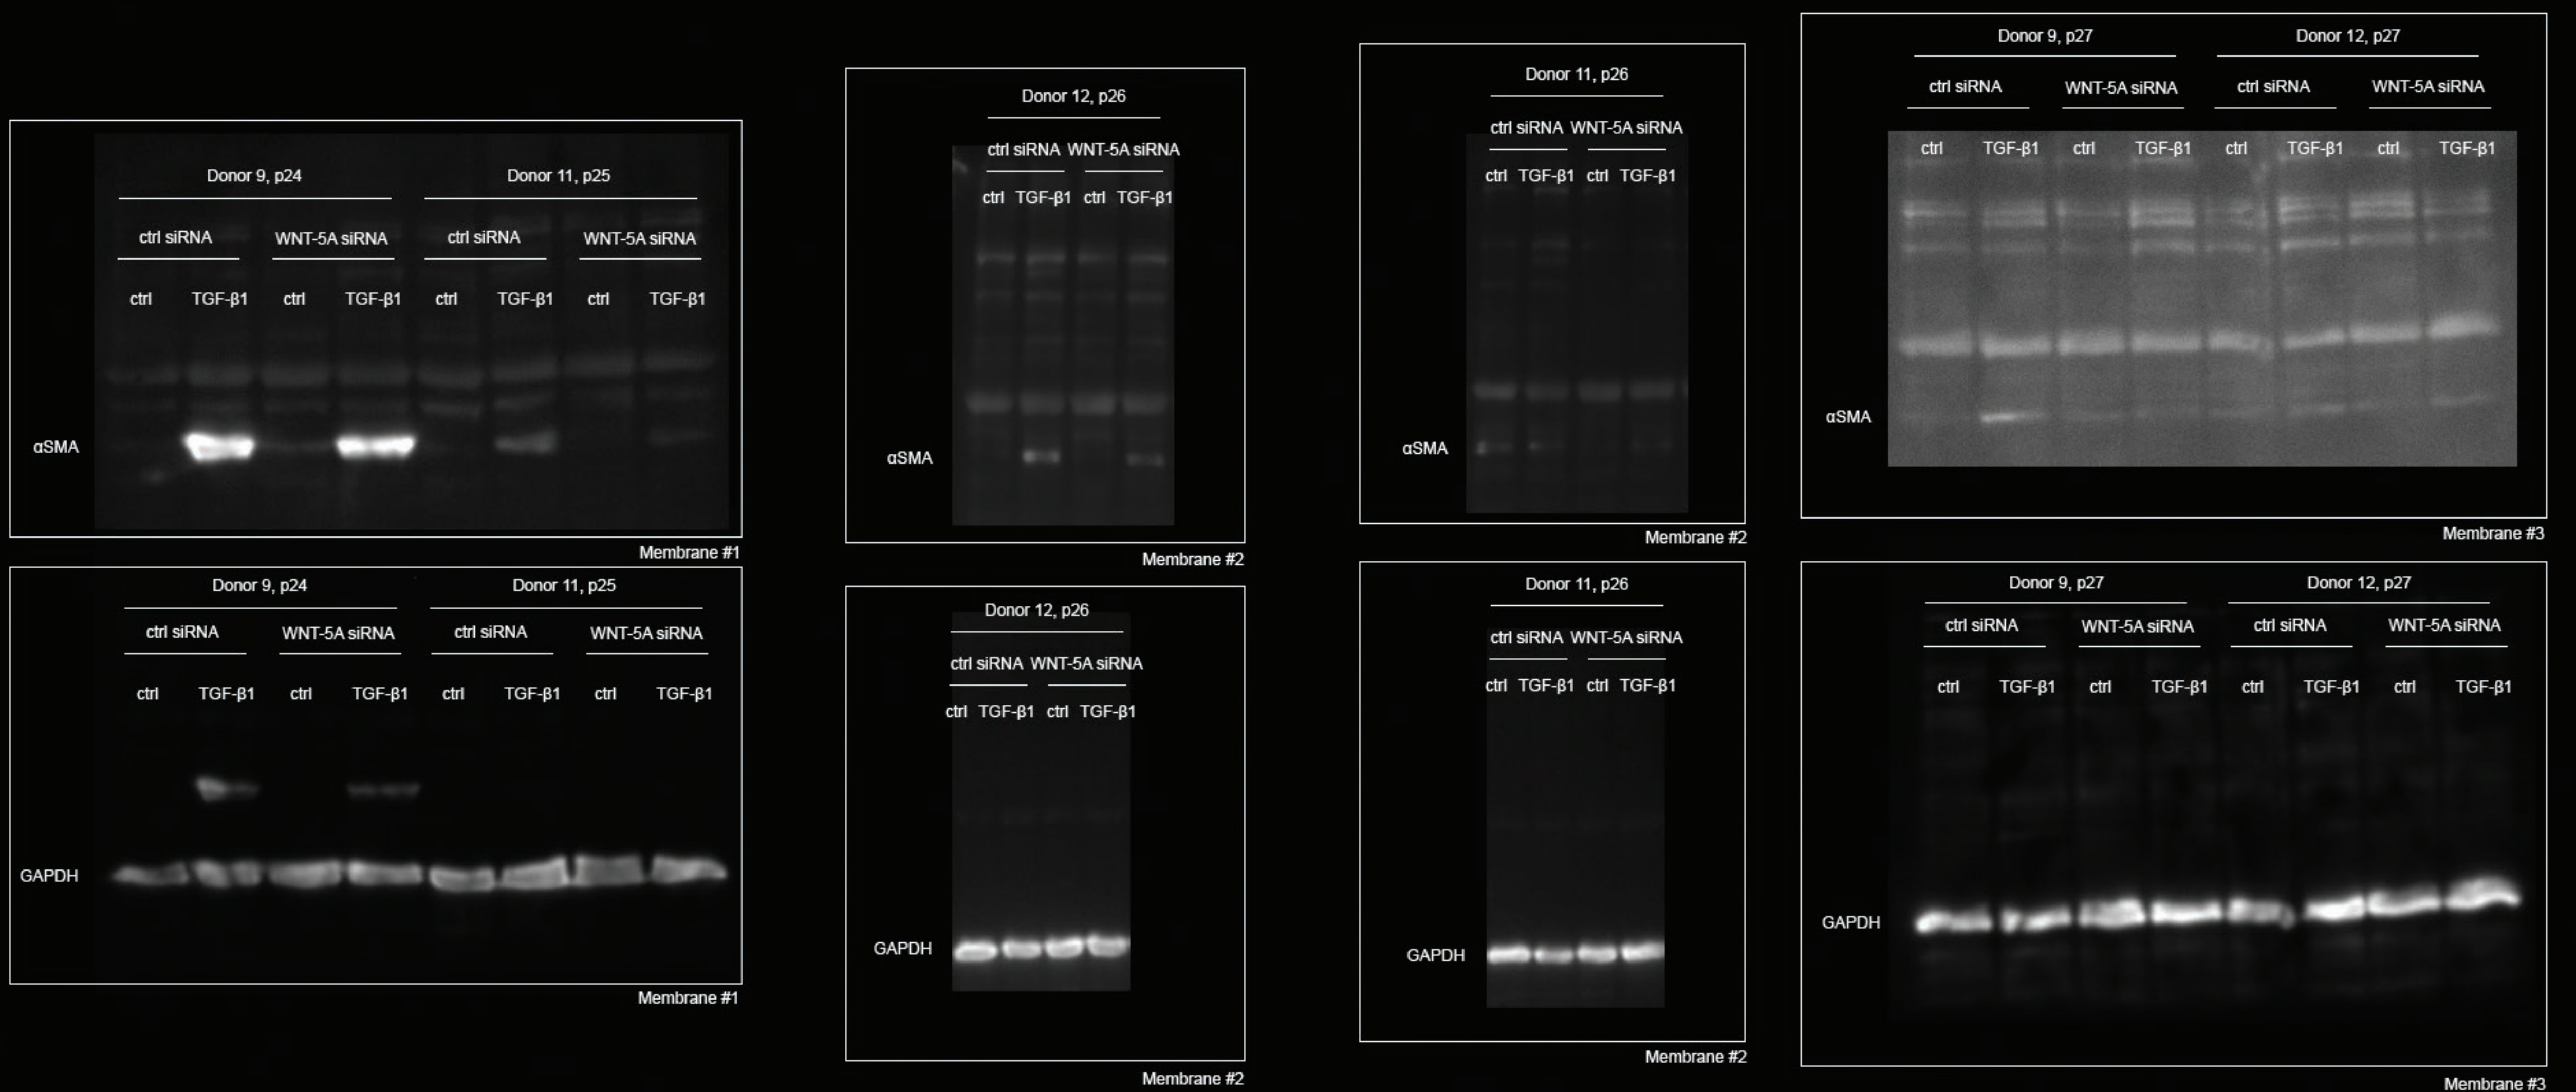

Supplement: srep30676-s1.pdf [file srep30676-s1.pdf]
